# Supplementary material
Source: Springer Nature journal article supplement (https://www.springermedizin.de/resource/supplementary/12933_2013_729_MOESM7_ESM.pdf/9538850)

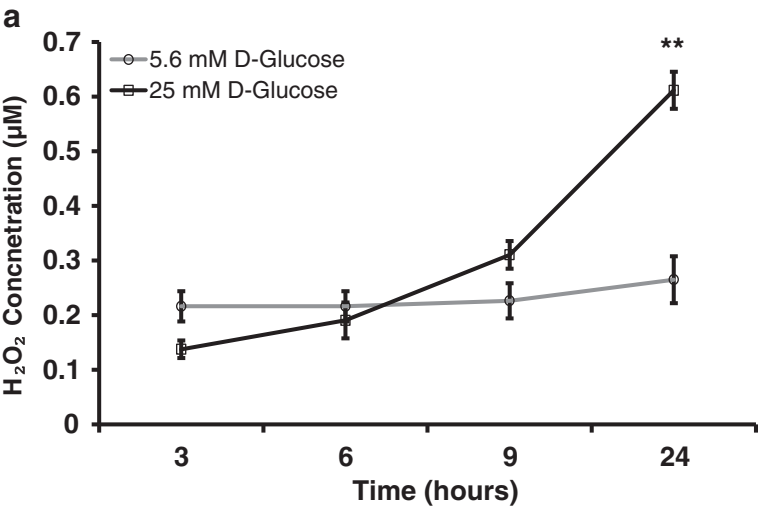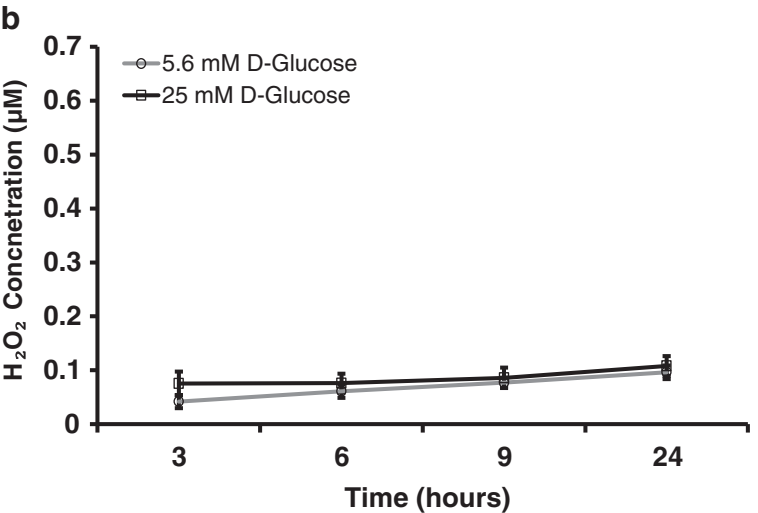

Supplement: MOESM7 [file 9538850]
